# Supplementary material for: Spatial Distribution of Immune Cells in Primary and Recurrent Glioblastoma: A Small Case Study
Source: MDPI journal article supplement (doi:10.3390/cancers15123256), 2023-06-20
Supplement: s1 [file s1]

# Supplemental Data

| <b><u>Target</u></b>      |
|---------------------------|
| <b>β-Catenin</b>          |
| <b>CD8</b>                |
| <b>B7-H3</b>              |
| <b>CD4</b>                |
| <b>FOXP3</b>              |
| <b>Mouse IgG1</b>         |
| <b>CD68</b>               |
| <b>PTEN</b>               |
| <b>IgG Rabbit Isotype</b> |
| <b>CD14</b>               |
| <b>S6</b>                 |
| <b>GZMB</b>               |
| <b>Ki-67</b>              |
| <b>β-2-macroglobulin</b>  |
| <b>Histone H3</b>         |
| <b>AKT</b>                |
| <b>CD3</b>                |
| <b>CD66B</b>              |
| <b>VISTA</b>              |
| <b>PD-1</b>               |
| <b>pSTAT3</b>             |
| <b>CD44</b>               |
| <b>STAT3</b>              |
| <b>CD56</b>               |
| <b>PDL-1</b>              |
| <b>CD45</b>               |
| <b>p-AKT</b>              |
| <b>HLA-DR</b>             |
| <b>CD20</b>               |
| <b>pan-Cytokeratin</b>    |
| <b>CD45RO</b>             |
| <b>Bcl-2</b>              |
| <b>B7-H4 VTCN1</b>        |
| <b>STING TMEM173</b>      |
| <b>IDO-1</b>              |
| <b>CD11c</b>              |
| <b>ICOS CD278</b>         |
| <b>OX40L CD252 TXGP1</b>  |
| <b>CD163</b>              |

Table S1: List of antigens analysed in this study

**A**

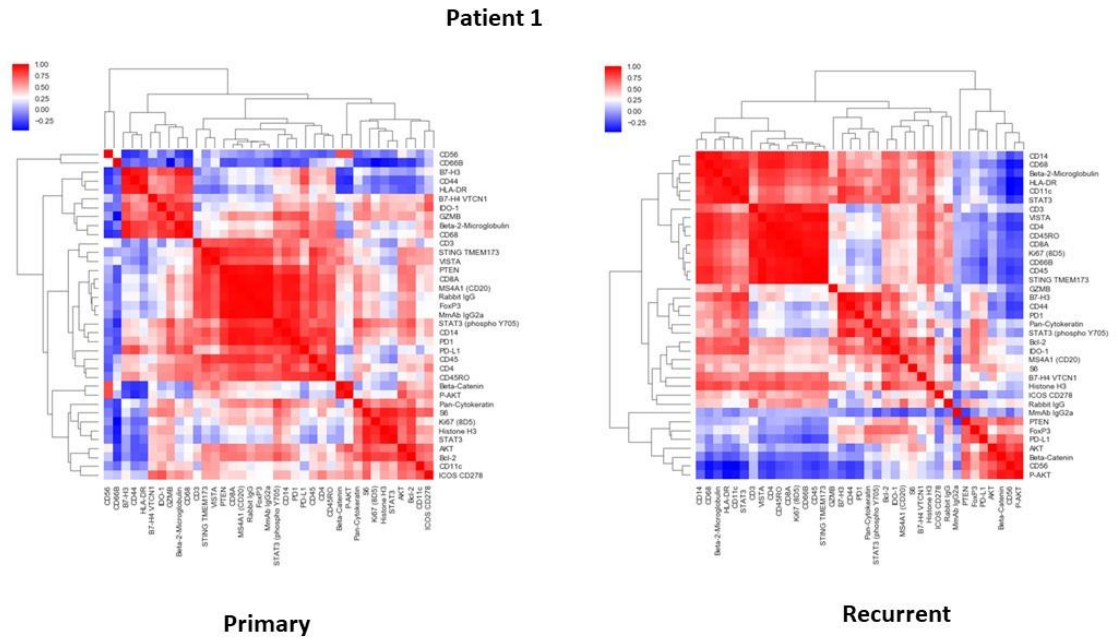

Figure S1A : Loussouarn et al.

**B**

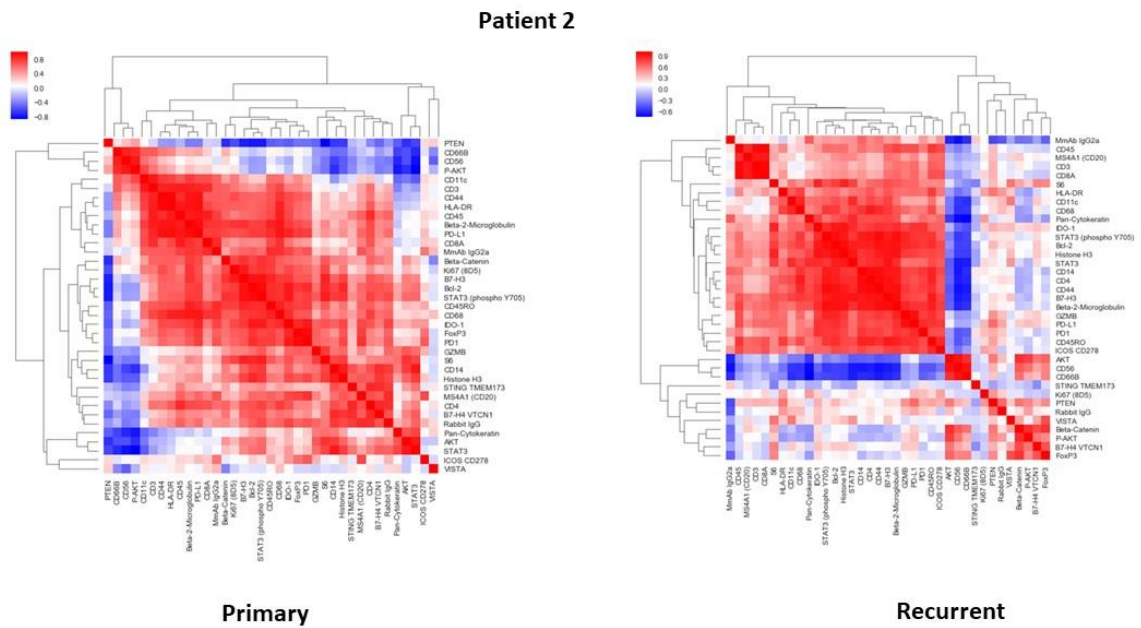

Figure S1B : Loussouarn et al.

C

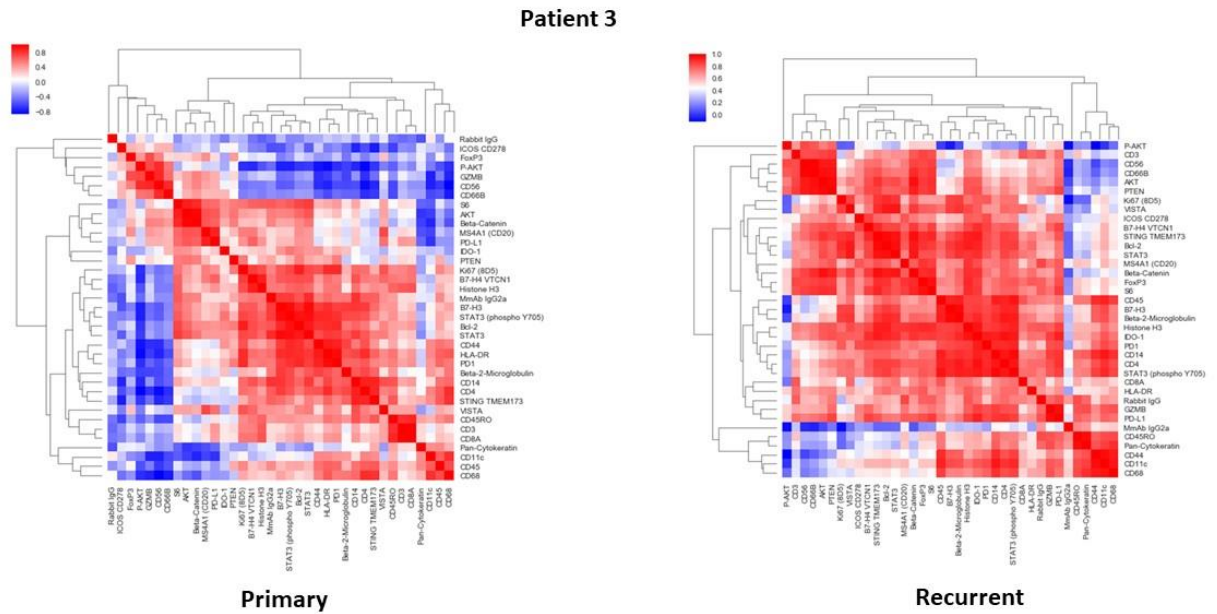

Figure S1C: Loussouarn et al.

D

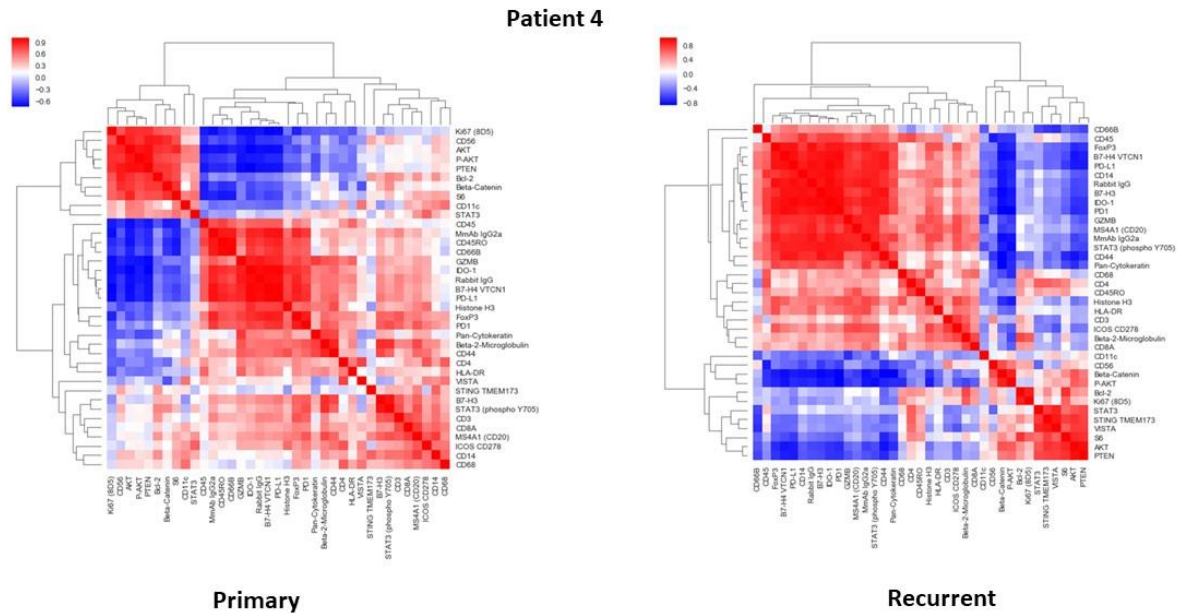

Figure S1D: Loussouarn et al.

### Patient 5

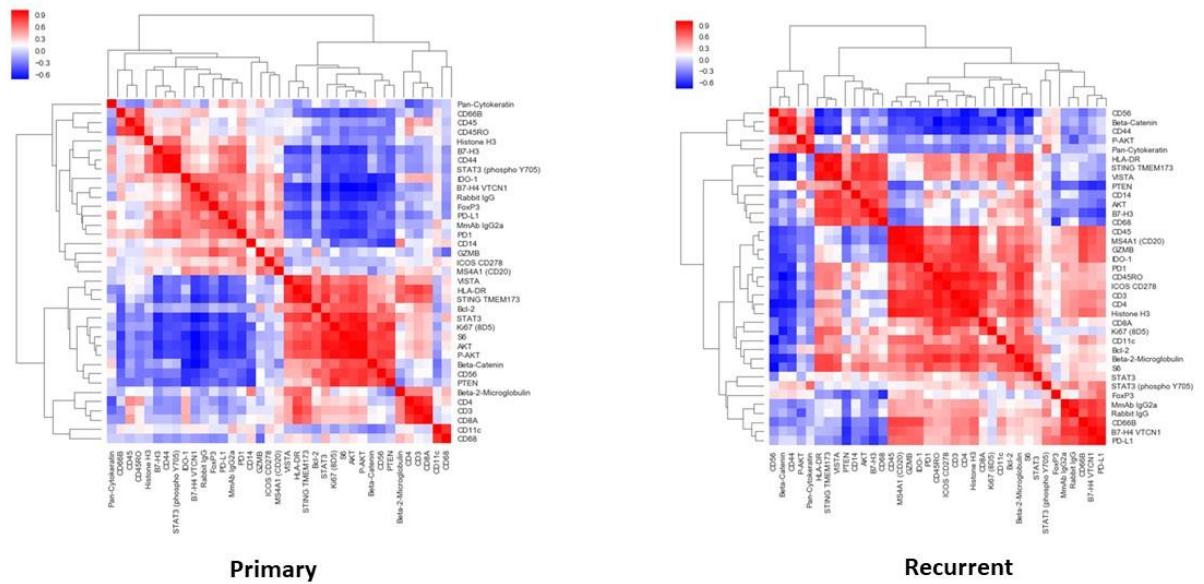

Figure S1E: Loussouarn et al.

Figure S1 (A-E): correlation matrix between the DSP markers in the 5 primary and recurrent tumors.

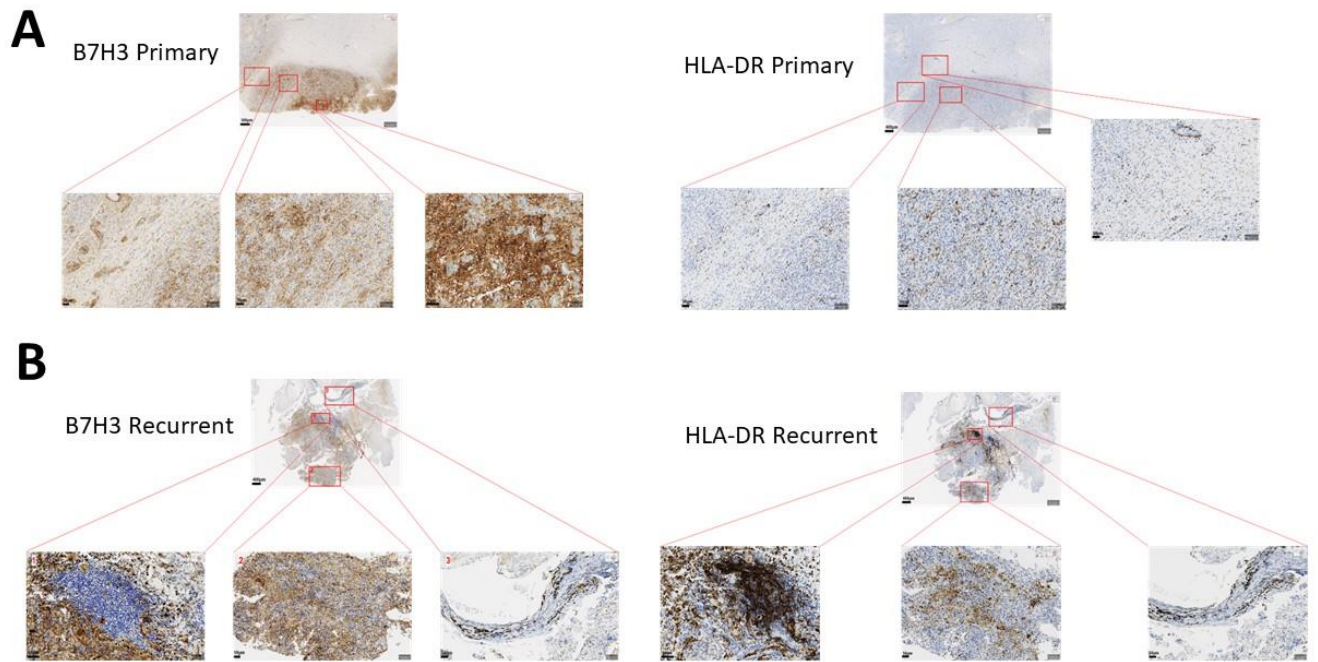

Figure S2: Loussouarn et al.

Figure S2: Immuno-histochemistry images of tumor labelling of HLADR and B7H3 in representative primary GBM (A) and recurrent GBM (B).
